# Supplementary material for: Thermal Change Index-Based Diabetic Foot Thermogram Image Classification Using Machine Learning Techniques
Source: MDPI journal article supplement (doi:10.3390/s22051793), 2022-02-24
Supplement: s1 [file s1]

|                     |         |         |          |        |       |        |        |         |        |        |          |       |       |        |       |         |        |       |        |        |        |        |        |         |        |        |        |        |        |       |       |        |        |        |        |       |       |       |
|---------------------|---------|---------|----------|--------|-------|--------|--------|---------|--------|--------|----------|-------|-------|--------|-------|---------|--------|-------|--------|--------|--------|--------|--------|---------|--------|--------|--------|--------|--------|-------|-------|--------|--------|--------|--------|-------|-------|-------|
| Gender              | -1      | -0.006  | -0.11    | -0.042 | -0.15 | -0.11  | 0.063  | 0.1     | -0.087 | 0.11   | 0.18     | 0.08  | 0.083 | 0.011  | -0.11 | 0.12    | 0.13   | 0.098 | 0.0960 | 0.0068 | -0.07  | 0.07   | 0.1    | 0.036   | 0.035  | 0.063  | -0.011 | 0.04   | 0.067  | 0.023 | 0.02  | 0.091  | -0.071 | 0.11   | 0.13   | 0.075 | 0.073 | 0.05  |
| Age                 | -0.006  | 1       | -0.059   | -0.066 | 0.072 | 0.11   | 0.11   | -0.0074 | 0.011  | -0.037 | 0.09     | 0.015 | 0.013 | -0.028 | 0.043 | -0.02   | 0.12   | 0.026 | 0.021  | -0.11  | -0.033 | 0.027  | 0.21   | 0.037   | 0.043  | 0.082  | -0.058 | 0.03   | 0.25   | 0.039 | 0.047 | 0.0056 | -0.01  | 0.0051 | 0.12   | 0.031 | 0.031 | -0.1  |
| NRT(Class 1)        | -0.11   | -0.059  | 1        | 0.91   | 0.61  | -0.3   | -0.89  | -0.73   | 0.15   | -0.78  | -0.00053 | -0.73 | -0.73 | 0.31   | 0.11  | -0.8    | 0.039  | -0.74 | -0.74  | 0.32   | 0.1    | -0.77  | -0.12  | -0.72   | -0.72  | 0.28   | 0.12   | -0.76  | -0.1   | -0.7  | -0.7  | 0.4    | 0.03   | -0.79  | -0.022 | -0.75 | -0.74 | 0.2   |
| NRT(Class 2)        | -0.042  | -0.066  | 0.91     | 1      | 0.33  | -0.55  | -0.93  | -0.71   | 0.09   | -0.74  | -0.098   | -0.72 | -0.72 | 0.35   | 0.044 | -0.75   | -0.062 | -0.73 | -0.73  | 0.31   | 0.0028 | -0.69  | -0.17  | -0.68   | -0.68  | 0.25   | 0.035  | -0.69  | -0.17  | -0.67 | -0.67 | 0.38   | -0.043 | -0.74  | -0.12  | -0.72 | -0.72 | 0.2   |
| NRT(Class 3)        | -0.15   | 0.072   | 0.61     | 0.33   | 1     | 0.44   | -0.31  | -0.41   | 0.19   | -0.5   | 0.2      | -0.36 | -0.36 | 0.045  | 0.18  | -0.53   | 0.24   | -0.38 | -0.37  | 0.2    | 0.14   | -0.59  | 0.054  | -0.43   | -0.43  | 0.2    | 0.13   | -0.55  | 0.06   | -0.41 | -0.4  | 0.2    | 0.2    | -0.54  | 0.17   | -0.4  | -0.39 | 0.1   |
| NRT(Class 4)        | -0.11   | 0.11    | -0.3     | -0.55  | 0.44  | 1      | 0.62   | 0.25    | 0.13   | 0.19   | 0.33     | 0.29  | 0.29  | -0.27  | 0.2   | 0.18    | 0.32   | 0.29  | 0.29   | -0.1   | 0.095  | 0.064  | 0.28   | 0.2     | 0.2    | -0.046 | 0.041  | 0.11   | 0.26   | 0.21  | 0.22  | -0.19  | 0.27   | 0.16   | 0.28   | 0.26  | 0.27  | -0.06 |
| NRT(Class 5)        | -0.063  | 0.11    | -0.89    | -0.93  | -0.31 | 0.62   | 1      | 0.68    | -0.13  | 0.69   | 0.12     | 0.69  | 0.68  | -0.35  | -0.06 | 0.71    | 0.083  | 0.7   | 0.7    | -0.29  | -0.086 | 0.63   | 0.2    | 0.64    | 0.65   | -0.24  | -0.12  | 0.64   | 0.17   | 0.64  | 0.64  | -0.38  | 0.026  | 0.69   | 0.13   | 0.69  | 0.69  | -0.2  |
| Highest Temperature | -0.1    | -0.0074 | -0.73    | -0.71  | -0.41 | 0.25   | 0.68   | 1       | -0.17  | 0.92   | 0.076    | 0.95  | 0.95  | -0.3   | -0.14 | 0.92    | 0.042  | 0.95  | 0.95   | -0.24  | -0.13  | 0.86   | 0.16   | 0.9     | 0.9    | -0.16  | -0.091 | 0.85   | 0.19   | 0.89  | 0.89  | -0.32  | 0.019  | 0.89   | 0.13   | 0.95  | 0.95  | -0.1  |
| MPA_HSE             | -0.087  | 0.011   | 0.15     | 0.09   | 0.19  | 0.13   | -0.17  | 1       | -0.35  | 0.12   | -0.29    | -0.31 | 0.42  | 0.76   | -0.32 | 0.12    | -0.29  | -0.29 | 0.36   | 0.53   | 0.26   | 0.11   | -0.25  | -0.26   | 0.28   | 0.58   | -0.22  | 0.081  | 0.23   | -0.23 | 0.27  | 0.73   | -0.29  | 0.11   | -0.28  | -0.29 | 0.3   |       |
| MPA_ET              | -0.11   | -0.037  | -0.78    | -0.74  | -0.5  | 0.19   | 0.69   | 0.92    | -0.35  | 1      | 0.033    | 0.95  | 0.95  | -0.45  | -0.25 | 0.98    | 0.0064 | 0.95  | 0.95   | -0.39  | -0.12  | 0.88   | 0.12   | 0.87    | 0.87   | -0.3   | -0.13  | 0.86   | 0.15   | 0.86  | 0.85  | -0.42  | -0.12  | 0.95   | 0.093  | 0.94  | 0.94  | -0.3  |
| MPA_ETD             | -0.18   | 0.09    | -0.00053 | 0.098  | 0.2   | 0.33   | 0.12   | 0.076   | 0.12   | 0.033  | 1        | 0.095 | 0.095 | -0.07  | 0.091 | 0.032   | 0.87   | 0.087 | 0.091  | 0.031  | 0.17   | -0.051 | 0.72   | 0.032   | 0.032  | 0.052  | 0.17   | -0.043 | 0.69   | 0.046 | 0.048 | -0.03  | 0.17   | 0.0046 | 0.74   | 0.07  | 0.068 | 0.02  |
| MPA_Mean            | -0.08   | 0.015   | -0.73    | -0.72  | -0.36 | 0.29   | 0.69   | 0.95    | -0.29  | 0.95   | 0.095    | 1     | 1     | -0.48  | -0.23 | 0.94    | 0.074  | 0.99  | 0.99   | -0.4   | -0.15  | 0.85   | 0.17   | 0.91    | 0.91   | -0.28  | -0.16  | 0.85   | 0.19   | 0.91  | 0.9   | -0.43  | -0.1   | 0.92   | 0.14   | 0.98  | 0.98  | -0.3  |
| MPA_Median          | -0.083  | 0.013   | -0.73    | -0.72  | -0.36 | 0.29   | 0.68   | 0.95    | -0.31  | 0.95   | 0.095    | 1     | 1     | -0.49  | -0.24 | 0.94    | 0.071  | 0.99  | 0.99   | -0.4   | -0.16  | 0.85   | 0.17   | 0.91    | 0.91   | -0.29  | -0.17  | 0.85   | 0.19   | 0.9   | 0.9   | -0.44  | -0.11  | 0.92   | 0.14   | 0.98  | 0.98  | -0.3  |
| MPA_STD             | -0.011  | -0.028  | 0.31     | 0.35   | 0.045 | -0.27  | -0.35  | -0.3    | 0.42   | -0.45  | -0.07    | -0.48 | -0.49 | 1      | 0.3   | -0.45   | -0.12  | -0.5  | -0.5   | 0.79   | 0.083  | -0.34  | -0.098 | -0.39   | -0.39  | 0.44   | 0.17   | -0.35  | -0.091 | -0.38 | -0.38 | 0.49   | 0.34   | -0.45  | -0.045 | -0.46 | -0.47 | 0.7   |
| LPA_HSE             | -0.11   | 0.043   | 0.11     | 0.044  | 0.18  | 0.2    | -0.06  | -0.14   | 0.76   | -0.25  | 0.091    | -0.23 | -0.24 | 0.3    | 1     | -0.28   | 0.11   | -0.24 | -0.25  | 0.3    | 0.65   | -0.23  | 0.036  | -0.23   | -0.24  | 0.24   | 0.48   | -0.2   | 0.034  | -0.22 | -0.22 | 0.2    | 0.74   | -0.26  | 0.075  | -0.24 | -0.25 | 0.2   |
| LPA_ET              | -0.12   | -0.02   | -0.8     | -0.75  | -0.53 | 0.18   | 0.71   | 0.92    | -0.32  | 0.98   | 0.032    | 0.94  | 0.94  | -0.45  | -0.28 | 1       | 0.0007 | 0.95  | 0.96   | -0.42  | -0.14  | 0.89   | 0.14   | 0.88    | 0.88   | -0.32  | -0.14  | 0.88   | 0.16   | 0.87  | 0.86  | -0.45  | -0.14  | 0.96   | 0.094  | 0.94  | 0.94  | -0.3  |
| LPA_ETD             | -0.13   | 0.12    | 0.039    | -0.062 | 0.24  | 0.32   | 0.083  | 0.042   | 0.12   | 0.0064 | 0.87     | 0.074 | 0.071 | -0.12  | 0.11  | -0.0007 | 1      | 0.068 | 0.069  | -0.04  | 0.12   | -0.07  | 0.68   | 0.00750 | 0.0066 | 0.028  | 0.12   | -0.059 | 0.67   | 0.021 | 0.023 | -0.037 | 0.14   | -0.016 | 0.73   | 0.049 | 0.05  | -0.0  |
| LPA_Mean            | -0.098  | 0.026   | -0.74    | -0.73  | -0.38 | 0.29   | 0.7    | 0.95    | -0.29  | 0.95   | 0.087    | 0.99  | 0.99  | -0.5   | -0.24 | 0.95    | 0.068  | 1     | 1      | -0.44  | -0.17  | 0.87   | 0.18   | 0.92    | 0.92   | -0.3   | -0.17  | 0.87   | 0.2    | 0.92  | 0.91  | -0.46  | -0.12  | 0.93   | 0.14   | 0.99  | 0.99  | -0.3  |
| LPA_Median          | -0.096  | 0.021   | -0.74    | -0.73  | -0.37 | 0.29   | 0.7    | 0.95    | -0.29  | 0.95   | 0.091    | 0.99  | 0.99  | -0.5   | -0.25 | 0.96    | 0.069  | 1     | 1      | -0.43  | -0.17  | 0.87   | 0.18   | 0.92    | 0.92   | -0.3   | -0.17  | 0.86   | 0.2    | 0.91  | 0.91  | -0.46  | -0.12  | 0.93   | 0.14   | 0.99  | 0.99  | -0.3  |
| LPA_STD             | -0.0068 | -0.11   | 0.32     | 0.31   | 0.2   | -0.1   | -0.29  | -0.24   | 0.36   | -0.39  | 0.031    | -0.4  | -0.4  | 0.79   | 0.3   | -0.42   | -0.04  | -0.44 | -0.43  | 1      | 0.15   | -0.43  | -0.08  | -0.44   | -0.44  | 0.55   | 0.22   | -0.43  | 0.037  | -0.42 | -0.41 | 0.54   | 0.44   | -0.48  | 0.034  | -0.44 | -0.43 | 0.8   |
| LCA_HSE             | -0.07   | -0.033  | 0.1      | 0.0028 | 0.14  | 0.095  | -0.086 | -0.13   | 0.53   | -0.12  | 0.17     | -0.15 | -0.16 | 0.083  | 0.65  | -0.14   | 0.12   | -0.17 | -0.17  | 0.15   | 1      | -0.24  | 0.13   | -0.21   | -0.22  | 0.25   | 0.69   | -0.19  | 0.1    | -0.19 | -0.19 | 0.24   | 0.52   | -0.17  | 0.11   | -0.18 | -0.18 | 0.1   |
| LCA_ET              | -0.07   | 0.027   | -0.77    | -0.69  | -0.59 | 0.064  | 0.63   | 0.86    | -0.26  | 0.88   | -0.051   | 0.85  | 0.85  | -0.34  | -0.23 | 0.89    | -0.07  | 0.87  | 0.87   | -0.43  | -0.24  | 1      | 0.085  | 0.95    | 0.95   | -0.33  | -0.24  | 0.98   | 0.1    | 0.93  | 0.93  | -0.5   | -0.24  | 0.94   | -0.044 | 0.91  | 0.91  | -0.4  |
| LCA_ETD             | -0.1    | 0.21    | -0.12    | -0.17  | 0.054 | 0.28   | 0.2    | 0.16    | 0.11   | 0.12   | 0.72     | 0.17  | 0.17  | -0.098 | 0.036 | 0.14    | 0.68   | 0.18  | 0.18   | -0.08  | 0.13   | 0.085  | 1      | 0.15    | 0.15   | 0.071  | 0.08   | 0.097  | 0.83   | 0.16  | 0.16  | -0.041 | 0.094  | 0.13   | 0.76   | 0.17  | 0.17  | 0.06  |
| LCA_Mean            | 0.036   | 0.037   | -0.72    | -0.68  | -0.43 | 0.2    | 0.64   | 0.9     | -0.25  | 0.87   | 0.032    | 0.91  | 0.91  | -0.39  | -0.23 | 0.88    | 0.0075 | 0.92  | 0.92   | -0.44  | -0.21  | 0.95   | 0.15   | 1       | 1      | -0.35  | -0.21  | 0.95   | 0.16   | 0.99  | 0.99  | -0.52  | -0.2   | 0.92   | 0.036  | 0.97  | 0.96  | -0.4  |
| LCA_Median          | -0.035  | 0.043   | -0.72    | -0.68  | -0.43 | 0.2    | 0.65   | 0.9     | -0.26  | 0.87   | 0.032    | 0.91  | 0.91  | -0.39  | -0.24 | 0.88    | 0.0066 | 0.92  | 0.92   | -0.44  | -0.22  | 0.95   | 0.15   | 1       | 1      | -0.35  | -0.22  | 0.95   | 0.16   | 0.99  | 0.99  | -0.53  | -0.2   | 0.92   | 0.035  | 0.96  | 0.96  | -0.4  |
| LCA_STD             | -0.063  | 0.082   | 0.28     | 0.25   | 0.2   | -0.046 | -0.24  | -0.16   | 0.28   | -0.3   | 0.052    | -0.28 | -0.29 | 0.44   | 0.24  | -0.32   | 0.028  | -0.3  | -0.3   | 0.55   | 0.25   | -0.33  | 0.071  | -0.35   | -0.35  | 1      | 0.3    | -0.33  | 0.073  | -0.33 | -0.33 | 0.78   | 0.26   | -0.31  | 0.019  | -0.31 | -0.31 | 0.6   |
| MCA_HSE             | -0.011  | -0.058  | 0.12     | 0.035  | 0.13  | 0.041  | -0.12  | -0.091  | 0.58   | -0.13  | 0.17     | -0.16 | -0.17 | 0.17   | 0.48  | -0.14   | 0.12   | -0.17 | -0.17  | 0.22   | 0.69   | -0.24  | 0.08   | -0.21   | -0.22  | 0.3    | 1      | -0.27  | 0.12   | -0.22 | -0.23 | 0.41   | 0.58   | -0.18  | 0.13   | -0.19 | -0.19 | 0.2   |
| MCA_ET              | 0.04    | 0.03    | -0.76    | -0.69  | -0.55 | 0.11   | 0.64   | 0.85    | -0.22  | 0.86   | -0.043   | 0.85  | 0.85  | -0.35  | -0.2  | 0.88    | -0.059 | 0.87  | 0.86   | -0.43  | -0.19  | 0.98   | 0.097  | 0.95    | 0.95   | -0.33  | -0.27  | 1      | 0.092  | 0.95  | 0.94  | -0.51  | -0.21  | 0.93   | -0.041 | 0.91  | 0.91  | -0.4  |
| MCA_ETD             | -0.067  | 0.25    | -0.1     | -0.17  | 0.06  | 0.26   | 0.17   | 0.19    | 0.081  | 0.15   | 0.69     | 0.19  | 0.19  | -0.091 | 0.034 | 0.16    | 0.67   | 0.2   | 0.2    | -0.037 | 0.1    | 0.1    | 0.83   | 0.16    | 0.16   | 0.073  | 0.12   | 0.092  | 1      | 0.16  | 0.16  | -0.036 | 0.11   | 0.14   | 0.7    | 0.18  | 0.18  | -0.01 |
| MCA_Mean            | -0.023  | 0.039   | -0.7     | -0.67  | -0.41 | 0.21   | 0.64   | 0.89    | -0.23  | 0.86   | 0.046    | 0.91  | 0.9   | -0.38  | -0.22 | 0.87    | 0.021  | 0.92  | 0.91   | -0.42  | -0.19  | 0.93   | 0.16   | 0.99    | 0.99   | -0.33  | -0.22  | 0.95   | 0.16   | 1     | 1     | -0.54  | -0.18  | 0.91   | 0.045  | 0.96  | 0.96  | -0.4  |
| MCA_Median          | -0.02   | 0.047   | -0.7     | -0.67  | -0.4  | 0.22   | 0.64   | 0.89    | -0.23  | 0.85   | 0.048    | 0.9   | 0.9   | -0.38  | -0.22 | 0.86    | 0.023  | 0.91  | 0.91   | -0.41  | -0.19  | 0.93   | 0.16   | 0.99    | 0.99   | -0.33  | -0.23  | 0.94   | 0.16   | 1     | 1     | -0.53  | -0.18  | 0.9    | 0.046  | 0.96  | 0.96  | -0.4  |
| MCA_STD             | -0.091  | 0.0056  | 0.4      | 0.38   | 0.2   | -0.19  | -0.38  | -0.32   | 0.27   | -0.42  | -0.03    | -0.43 | -0.44 | 0.49   | 0.2   | -0.45   | -0.037 | -0.46 | -0.46  | 0.54   | 0.24   | -0.5   | -0.041 | -0.52   | -0.53  | 0.78   | 0.41   | -0.51  | -0.036 | -0.54 | -0.53 | 1      | 0.24   | -0.46  | -0.024 | -0.48 | -0.48 | 0.6   |
| FullFoot_HSE        | -0.071  | -0.01   | 0.03     | -0.043 | 0.2   | 0.27   | 0.026  | 0.019   | 0.73   | -0.12  | 0.17     | -0.1  | -0.11 | 0.34   | 0.74  | -0.14   | 0.14   | -0.12 | -0.12  | 0.44   | 0.52   | -0.24  | 0.094  | -0.2    | -0.2   | 0.26   | 0.58   | -0.21  | 0.11   | -0.18 | -0.18 | 0.24   | 1      | -0.26  | 0.18   | -0.15 | -0.16 | 0.4   |
| FullFoot_ET         | -0.11   | 0.0051  | -0.79    | -0.74  | -0.54 | 0.16   | 0.69   | 0.89    | -0.29  | 0.95   | 0.0046   | 0.92  | 0.92  | -0.45  | -0.26 | 0.96    | -0.016 | 0.93  | 0.93   | -0.48  | -0.17  | 0.94   | 0.13   | 0.92    | 0.92   | -0.31  | -0.18  | 0.93   | 0.14   | 0.91  | 0.9   | -0.46  | -0.26  | 1      | 0.043  | 0.94  | 0.94  | -0.4  |
| FullFoot_ETD        | -0.13   | 0.12    | -0.022   | -0.12  | 0.17  | 0.28   | 0.13   | 0.13    | 0.11   | 0.093  | 0.74     | 0.14  | 0.14  | -0.045 | 0.075 | 0.094   | 0.73   | 0.14  | 0.14   | 0.034  | 0.11   | -0.044 | 0.76   | 0.036   | 0.035  | 0.019  | 0.13   | -0.041 | 0.7    | 0.045 |       |        |        |        |        |       |       |       |

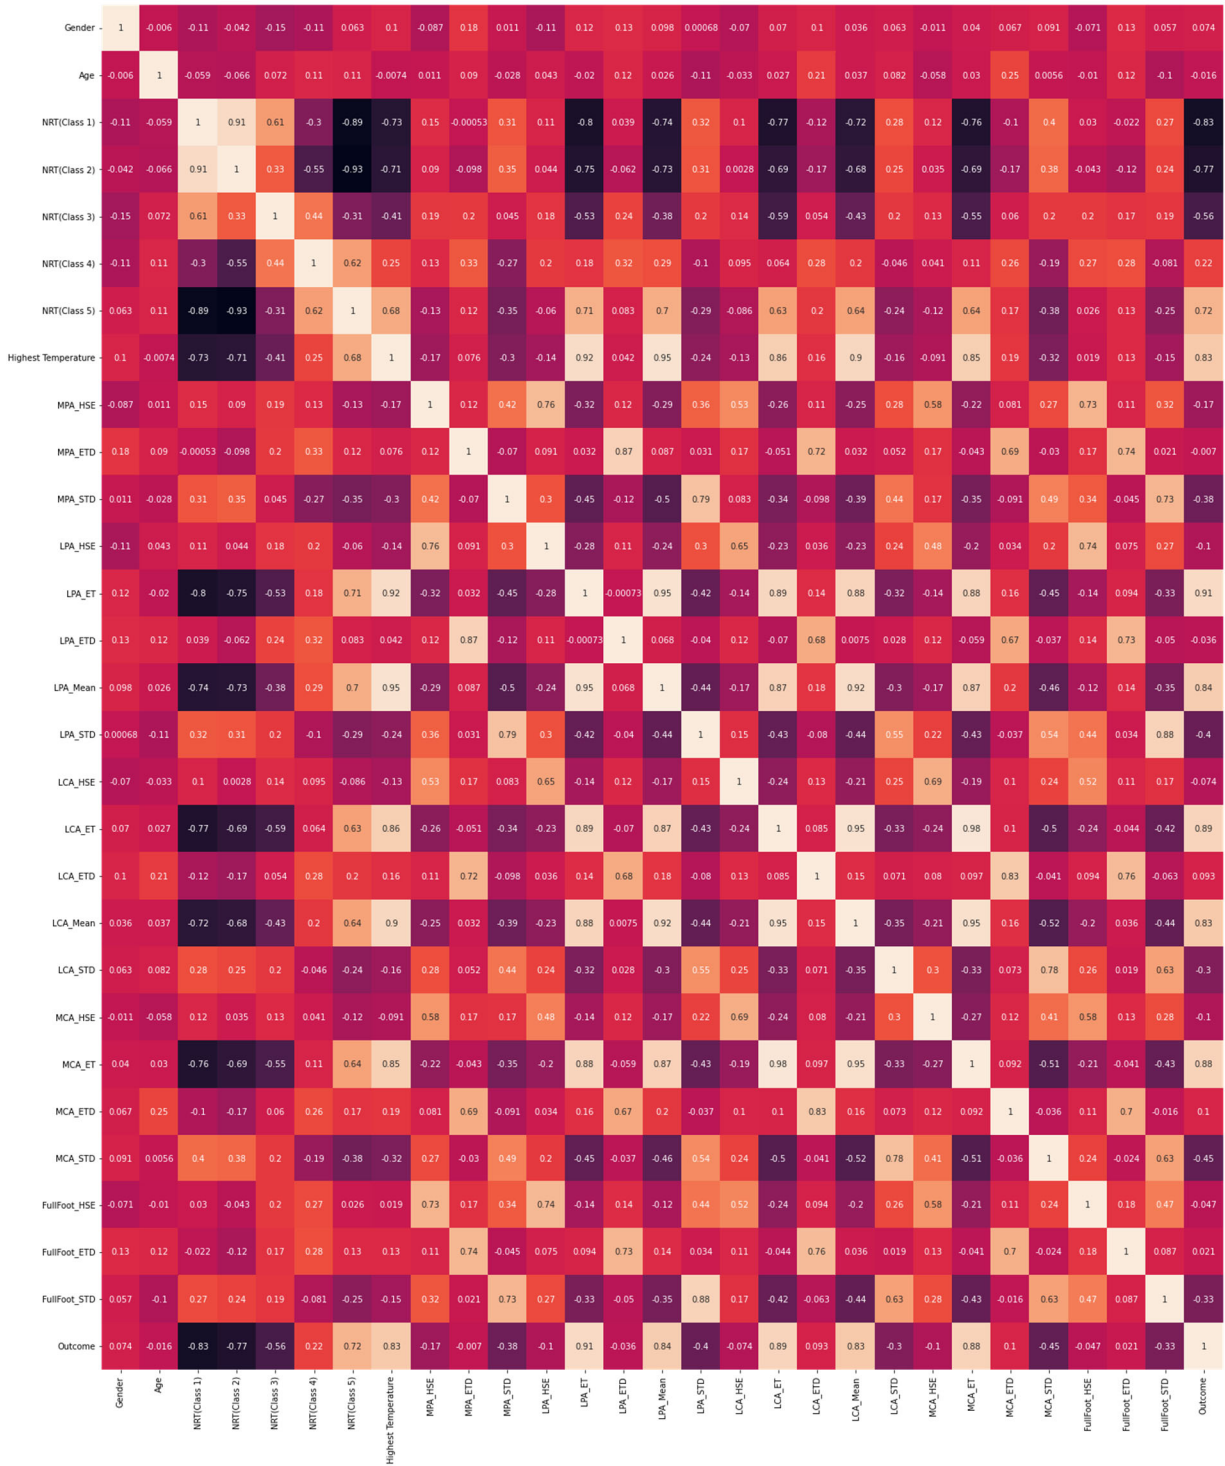

(B)

Figure S1. Heat map of the correlation using 38 features (A), and 28 features after removing features with more than 95% correlation (B).
